# Supplementary material
Source: publisher figshare collection journal article supplement (https://frontiersin.figshare.com/ndownloader/files/13722875)
Supplement: Supplementary file [file 13722875]

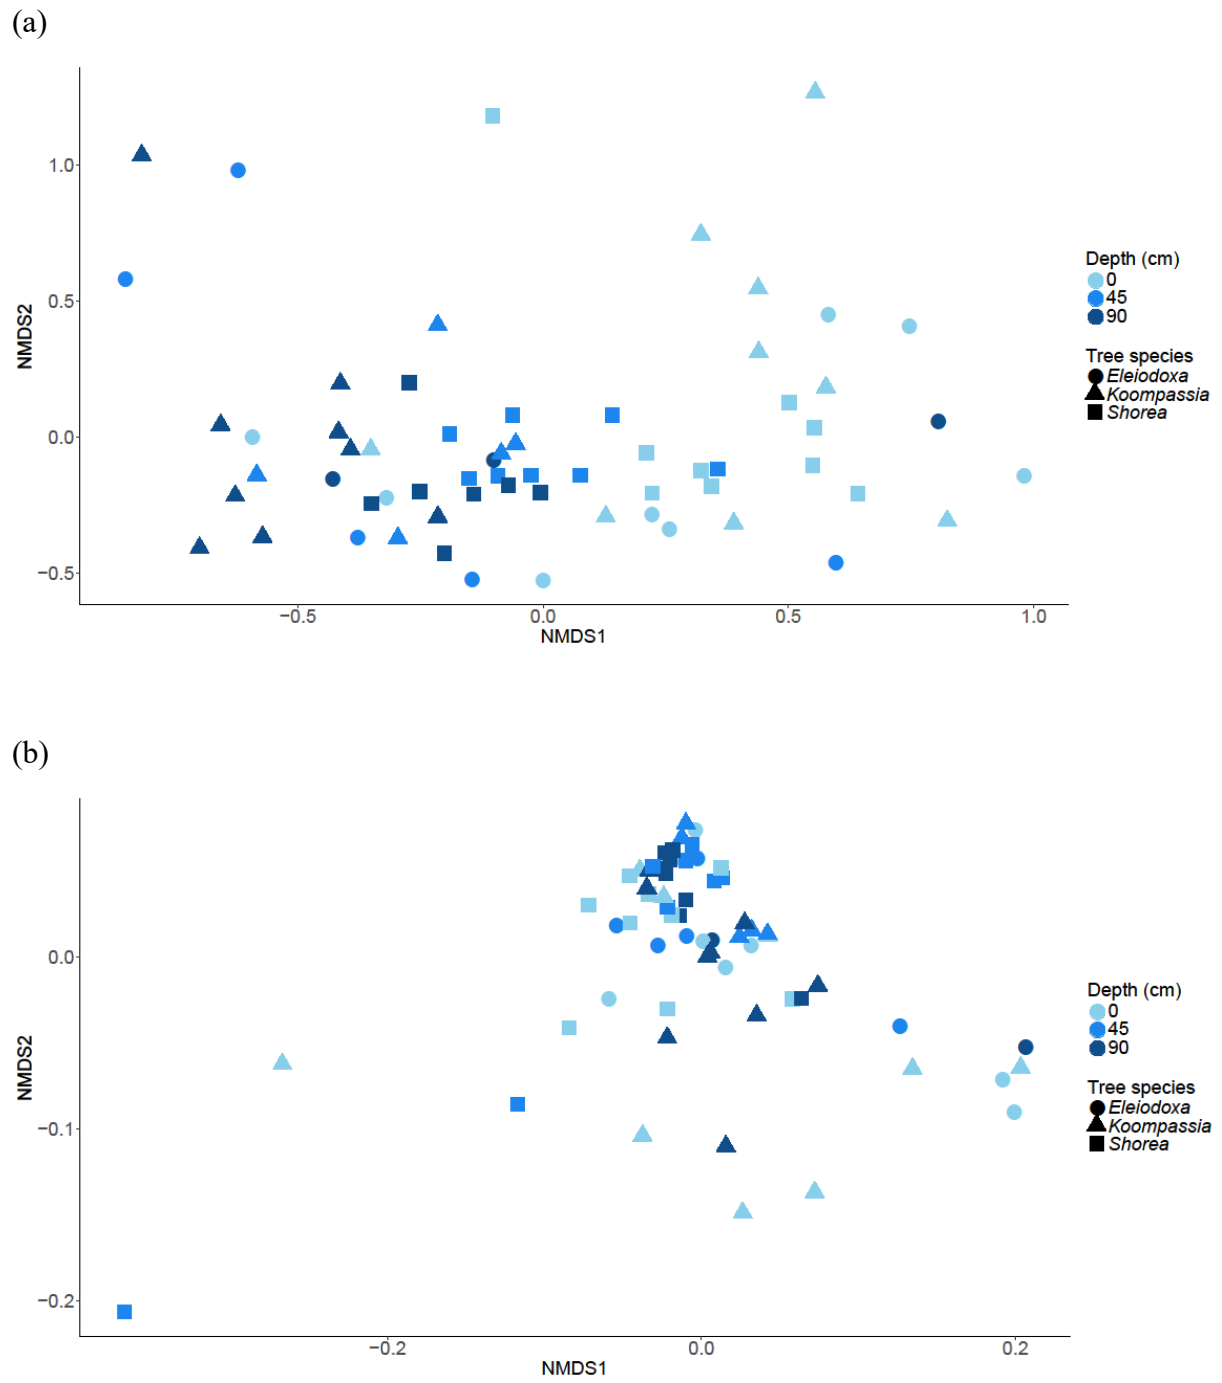

Figure S2. NMDS plot based on (a) Bray-Curtis dissimilarity and (b) weighted *UniFrac* distance of the archaeal communities in NSPSF.
